# Supplementary material
Source: Springer Nature journal article supplement (http://www.springermedizin.de/resource/supplementary/13195_2014_222_MOESM3_ESM.pdf/9688532)
Supplement: MOESM3 [file 9688532]

## Cognitive

- Non-amnesic cognitive impairments
- Cognitive fluctuations (less common)

## Psychiatric / behavioural

- REM sleep behaviour disorder
- Visual hallucinations
- Depression
- Delirium

## Physical

- Parkinsonism
- Hyposmia
- Constipation
- Orthostatic hypotension
